# Supplementary material
Source: MDPI journal article supplement (https://www.mdpi.com/2071-1050/13/20/11265)
Supplement: s1 [file s1]

# Environmental assessment of latent heat thermal energy storage technology system with phase change material for domestic heating applications

Daniel Chocontá Bernal, Edmundo Muñoz, Giovanni Manente, Adriano Sciacovelli, Hossein Ameli, Alejandro Gallego-Schmid

## Supplementary Information

**Table S1.** Main features of the piping in the phase change material (PCM), collector and water tank circuits. Adapted from Englmaier et al. (2020).

| Piping Section            | Length (m) | Material (m) | Inner diameter (m) | Outer diameter (m) | Linear weight (kg/m) | Piping weight (kg) |
|---------------------------|------------|--------------|--------------------|--------------------|----------------------|--------------------|
| PCM circuit               | 19         | Steel        | 0.0222             | 0.0269             | 1.42                 | 26.98              |
| Collector circuit         | 35         | Copper       | 0.0200             | 0.02200            | 0.59                 | 20.65              |
| Buffer water tank circuit | 9          | Steel        | 0.0222             | 0.0269             | 1.42                 | 12.78              |

## References

Englmaier, G., Kong, W., Brinkø Berg, J., Furbo, S., Fan, J. (2020) 'Demonstration of a solar combi-system utilizing stable supercooling of sodium acetate trihydrate for heat storage', *Applied Thermal Engineering* 166, 114647. doi: 10.1016/j.applthermaleng.2019.
